# Supplementary material
Source: PubMed Central journal article supplement (PMC4739674)
Supplement: 10.1074_M115.051573_mcp.M115.051573-1.pdf [file 10.1074_M115.051573_mcp.M115.051573-1.pdf]

## Multi-step fractionation and mass spectrometry reveals zwitterionic and anionic modifications of the N- and O-glycans of a marine snail

Barbara Eckmair, Chunsheng Jin (金春生), Daniel Abed-Navandi  
and Katharina Paschinger

### Supplementary Table

**Summary of evidence for the proposed structures of N-glycans from *Volvarina rubella* (C. B. Adams, 1845).** For each predicted structure, brief summaries of the evidence referring also to relevant figures are presented: key fragments, digest data and co-elution in terms of glucose units (g.u.) using the same Kinetex XB-C18 column as previously published for *Pristionchus pacificus* (the relative elution position also aids structural prediction). Structures are depicted according to the nomenclature of the Consortium for Functional Glycomics. Semi-quantitation (+++, ++ and +) is according to HPLC fluorescence data and MALDI-TOF MS relative intensity.  $m/z$  values are calculated with Glycoworkbench generally as  $[M+H]^+$ , except for glycans well observed in the negative ion mode; the mass accuracy for a representative spectrum for each glycan is given in brackets ( $\Delta m/z$ ) and, considering all the glycans listed, is on average +0.03 Da (+ 22 ppm) as compared to the calculated  $m/z$  values. The minimum criterion for inclusion in the table is an interpretable MALDI-TOF MS/MS spectrum; furthermore, the proposals for 60 of the approximately 100 structures are also supported by MS and MS/MS data obtained after chemical and enzymatic treatments. For about 20 representative glycans there are also LC-MS<sup>n</sup> data. Further N-glycans with alternative antennal structures are predicted to be present, but are not included in the Table due to ambiguity in the MS/MS.

| Structure | [M+H] <sup>+</sup>              | [M-H] <sup>-</sup> | PNGase F |             |         | PNGase A | Evidence                                                                                                                                                                           | Structure | [M+H] <sup>+</sup>              | [M-H] <sup>-</sup>             | PNGase F |             |         | PNGase A                                                                                                                                          | Evidence                                                                                                                                                        |
|-----------|---------------------------------|--------------------|----------|-------------|---------|----------|------------------------------------------------------------------------------------------------------------------------------------------------------------------------------------|-----------|---------------------------------|--------------------------------|----------|-------------|---------|---------------------------------------------------------------------------------------------------------------------------------------------------|-----------------------------------------------------------------------------------------------------------------------------------------------------------------|
|           |                                 |                    | neutral  | hydrophobic | anionic |          |                                                                                                                                                                                    |           |                                 |                                | neutral  | hydrophobic | anionic |                                                                                                                                                   |                                                                                                                                                                 |
|           | 811.34<br>13.5 g.u.<br>[-0.02]  |                    | ++       |             | +       |          | key fragment [446]<br>co-elution with <i>Pristionchus</i>                                                                                                                          |           | 1135.45<br>15.5 g.u.<br>[0.08]  |                                | ++       |             | +       | +                                                                                                                                                 | key fragment [446]<br>co-elution with <i>Pristionchus</i><br>sensitive to α1,2/3-mannosidase (-1Man) and bovine fucosidase (-1Fuc)                              |
|           | 827.34<br>8.5 g.u.<br>[-0.01]   |                    | +        |             |         |          | key fragment [462]<br>insensitive to α1,6- and<br>α1,2/3-mannosidase<br>sensitive to β-mannosidase (-2Man)                                                                         |           | 1135.45<br>> 20 g.u.<br>[-0.04] |                                | +        | ++          |         |                                                                                                                                                   | key fragments [608/827] <b>see Fig.3B</b><br>sensitive to β-galactosidase (-1Gal)<br>prior to bovine fucosidase (-1Fuc)<br>sensitive to α1,6-mannosidase(-1Man) |
|           | 827.34<br>9.8 g.u.<br>[-0.03]   |                    | ++       |             |         |          | co-elution with <i>Pristionchus</i><br>sensitive to α1,6-mannosidase<br>(-1Man)                                                                                                    |           | 1151.44<br>7.4 g.u.<br>[-0.03]  |                                | +        |             |         |                                                                                                                                                   | key fragment [665]<br>α1,2/3-mannosidase sensitive only<br>after α1,6-mannosidase<br>(each -1Man)                                                               |
|           | 934.34<br>6.2 g.u.<br>[0.09]    | 932.36             | +        |             |         |          | key fragments [635/827]<br><b>see Fig.10A</b><br>m/z Δ107 instead of 121                                                                                                           |           | 1151.44<br>8.5 g.u.<br>[0.04]   |                                | +        |             |         |                                                                                                                                                   | key fragment [827]<br>sensitive to α1,6-mannosidase (-1Man)                                                                                                     |
|           | 948.38<br>6.6 g.u.<br>[0.08]    | 946.36             | ++       |             |         | +        | key fragments [283/649/827], <b>see Fig.10B/<br/>Fig.12 A+B</b><br>JB-mannosidase insensitive,<br>HF sensitive (loss of 121)<br>prior to α1,6-mannosidase (-1Man)                  |           | 1151.44<br>9.3 g.u.<br>[-0.03]  |                                |          |             |         |                                                                                                                                                   | key fragment [827]<br>co-elution with <i>Pristionchus</i>                                                                                                       |
|           | 973.39<br>5.5 g.u.<br>[0.06]    |                    |          |             |         | +        | key fragment [446]<br>in PNGase A pool only<br>co-elution with <i>Pristionchus</i>                                                                                                 |           | 1151.44<br>9.8 g.u.<br>[0.01]   |                                | ++       |             |         |                                                                                                                                                   | key fragment [462] <b>see Fig. 8B</b><br>sensitive to JB-mannosidase<br>(-2 Man)                                                                                |
|           | 973.39<br>16.0 g.u.<br>[-0.03]  |                    | +++      | +           | +       | +        | key fragment [446]<br>co-elution with <i>Pristionchus</i><br>sensitive to α1,6-mannosidase (-1Man)<br>and bovine fucosidase (-1Fuc)                                                |           | 1151.46<br>14.5 g.u.<br>[0.03]  | 1149.44                        | ++       |             | +       | key fragments [324/486/827/1030]<br>sensitive to HF (loss of 121)<br>afterwards insensitive to FDL<br><b>see Fig. 11/ Fig. 12C-D</b>              |                                                                                                                                                                 |
|           | 989.39<br>8.5 g.u.<br>[-0.03]   |                    | +        |             |         |          | key fragment [665]<br>sensitive to α1,6-mannosidase (-2Man)<br>insensitive to α1,2/3-mannosidase                                                                                   |           | 1176.47<br>>20 g.u.<br>[0.10]   |                                | +        |             | +       | key fragments [446/1030]<br>late elution indicative of upper arm                                                                                  |                                                                                                                                                                 |
|           | 989.39<br>9.3 g.u.<br>[-0.04]   |                    | +        |             |         |          | key fragment [827]<br>co-elution with <i>Pristionchus</i><br>sensitive to α1,2/3-mannosidase (-1Man)                                                                               |           | 1192.47<br>8.2 g.u.<br>[0.04]   |                                | +        |             |         | key fragment [1030]<br>co-elution with <i>Pristionchus</i><br>sensitive to FDL (-1GlcNAc)                                                         |                                                                                                                                                                 |
|           | 989.39<br>11.0 g.u.<br>[0.08]   |                    | +        |             |         |          | key fragment [462] <b>see Fig. 8A</b><br>sensitive to α1,6-mannosidase,<br>β-mannosidase and JB-mannosidase<br>(each -1Man) <b>see Fig. 9</b><br>insensitive to α1,2/3-mannosidase |           | 1192.47<br>16.0 g.u.<br>[-0.12] |                                | ++       |             |         | key fragment [989]<br>co-elution with <i>Pristionchus</i><br>sensitive to α1,2/3-mannosidase<br>(-1Man)                                           |                                                                                                                                                                 |
|           | 1094.44<br>11.0 g.u.<br>[0.07]  | 1092.42            | ++       |             |         |          | key fragments [283/446/948/973]<br><b>see Fig. 10C</b><br>sensitive to HF (loss of 121, afterwards<br>insensitive to α1,2/3-mannosidase)                                           |           | 1192.47<br>17.0 g.u.<br>[0.07]  |                                | +        |             |         | key fragments [462/989]<br><b>see Fig. 8C</b><br>late elution indicative of upper arm                                                             |                                                                                                                                                                 |
|           | 1119.45<br>8.4 g.u.<br>[0.11]   |                    |          |             |         | ++       | key fragment [592]<br>in PNGase A pool only<br>insensitive to α1,2/3-mannosidase                                                                                                   |           | 1231.48<br>4.7 g.u.<br>[0.05]   | 1229.46                        | ++       |             | +       | key fragments [283/729/932/948]<br><b>see Fig.10D</b> ; sensitive to HF<br>(loss of 2x121), afterwards sensitive<br>to α1,2/3-mannosidase (-1Man) |                                                                                                                                                                 |
|           | 1119.45<br>> 20 g.u.<br>[-0.03] |                    |          | +++         |         |          | key fragments [665/754]<br><b>see Fig. 3C</b><br>fragmentation similar to m/z 1281 (< 20 g.u)                                                                                      |           | 1240.49<br>11.8 g.u.<br>[-0.06] | 1238.48                        | +        | +           |         | key fragments [665/875]<br>HF sensitive (loss of 121), then same<br>fragmentation as 1119 >20 g.u.                                                |                                                                                                                                                                 |
|           | 1135.45<br>5.3 g.u.<br>[0.10]   |                    |          |             |         | ++       | key fragment [446]<br>in PNGase A pool only<br>co-elution with <i>Pristionchus</i>                                                                                                 |           |                                 | 1254.42<br>17.0 g.u.<br>[0.09] | +        |             |         | key fragment [282 negative mode]<br>sensitive to bovine fucosidase<br>sulphation results in earlier elution as<br>m/z 1176 (<20 g.u)              |                                                                                                                                                                 |

| Structure   | [M+H] <sup>+</sup>              | [M-H] <sup>-</sup>             | PNGase F |             |         | PNGase A | Evidence                                                                                                                                                                                                            | Structure    | [M+H] <sup>+</sup>              | [M-H] <sup>-</sup>                          | PNGase F |             |         | PNGase A | Evidence                                                                                                                                                                                                      |
|-------------|---------------------------------|--------------------------------|----------|-------------|---------|----------|---------------------------------------------------------------------------------------------------------------------------------------------------------------------------------------------------------------------|--------------|---------------------------------|---------------------------------------------|----------|-------------|---------|----------|---------------------------------------------------------------------------------------------------------------------------------------------------------------------------------------------------------------|
|             |                                 |                                | neutral  | hydrophobic | anionic |          |                                                                                                                                                                                                                     |              |                                 |                                             | neutral  | hydrophobic | anionic |          |                                                                                                                                                                                                               |
| H3N2F[MAEP] | 1256.44<br>10.8 g.u.<br>[0.11]  | 1254.42                        | ++       |             |         |          | key fragments [283/446/1135] sensitive to HF (loss of 121), insensitive to $\alpha$ 1,2/3-mannosidase, sensitive to JB-mannosidase (-1Man)                                                                          | H3N4         | 1395.55<br>9.0 g.u.<br>[0.06]   |                                             | +        |             |         |          | key fragments [406/827] insensitive to FDL and $\alpha$ 1,2/3-mannosidase elution before biantennary <i>m/z</i> 1395                                                                                          |
| H3N3S       |                                 | 1270.41<br>6.8 g.u.<br>[-0.01] | ++       |             |         | +        | key fragments [282/444 negative mode] see Fig. 14 A sulphation results in earlier elution as <i>m/z</i> 1192 (8.2 g.u)                                                                                              | H3N4         | 1395.55<br>11.0 g.u.<br>[0.15]  |                                             | ++       |             |         |          | key fragments [1030/1192] co-elution with <i>Pristionchus</i>                                                                                                                                                 |
| H2N3[MAEP]2 | 1272.50<br>5.2 g.u.<br>[0.06]   | 1270.49                        | ++       |             |         | +        | key fragments [283/324/608/948] see Fig.10E sensitive to HF (loss of 2x121), afterwards insensitive to FDL                                                                                                          | H3N2F2[MAEP] | 1402.55<br>14.2 g.u.<br>[-0.06] | 1400.53                                     | +        | ++          |         |          | key fragments [430/576/827/875] see Fig. 3E sensitive to $\alpha$ 1,2-fucosidase (-1Fuc) and $\alpha$ 1,6-mannosidase (-1Man) sensitive to HF (loss of 121), then fragmentation as 1281 > 20 g.u., see Fig. 5 |
| H3N2F2      | 1281.50<br>8.4 g.u.<br>[0.11]   |                                |          |             |         | +++      | key fragments [446/592] see Fig. 3A in PNGase A pool only co-elution with <i>Pristionchus</i> sensitive to $\alpha$ 1,2/3-mannosidase (-1Man)                                                                       | H3N2F2[MAEP] | 1402.55<br>>20 g.u.<br>[0.09]   | 1400.53                                     |          | +           |         |          | key fragments [649/754/948] see Fig. 3F                                                                                                                                                                       |
| H3N2F2      | 1281.50<br>>20 g.u.<br>[0.09]   |                                |          | +++         |         |          | key fragments [754/827] see Fig.3D sensitive to $\alpha$ 1,2-fucosidase (-1Fuc) prior to $\beta$ -galactosidase (-1Gal), prior to bovine fucosidase (-1Fuc) sensitive to $\alpha$ 1,6-mannosidase (-1Man) see Fig.4 | H3N3FS       |                                 | 1416.47<br>9.8 g.u.<br>[-0.03]              | ++       |             |         | ++       | key fragment [282 negative mode] insensitive to HF, JB-hexosaminidase and $\alpha$ 1,2/3-mannosidase sensitive to JB-mannosidase (-1Man) see Fig. 14 B/E/F/G/H                                                |
| H2N2F2PC    | 1284.51<br>11.3 g.u.<br>[-0.04] |                                | +        | +           |         |          | key fragments [474/620/919] HF sensitive (loss of 165), then same fragmentation as 1119 >20 g.u.                                                                                                                    | H3N3FS       |                                 | 1416.47<br>15.0 g.u.<br>[0.02]              | +        |             |         | +        | key fragment [282 negative mode] sulphation results in earlier elution as <i>m/z</i> 1338 (<20 g.u)                                                                                                           |
| H5N2        | 1313.49<br>7.2 g.u.<br>[-0.04]  |                                | +++      |             |         |          | key fragment [665] sensitive to JB-mannosidase (-4Man) insensitive to $\alpha$ 1,2/3-mannosidase sensitive to $\alpha$ 1,6-mannosidase (-1Man) then coeluting with standard B /see Fig. 7D                          | H3N3[MAEP]2  | 1434.55<br>11.0 g.u.<br>[-0.07] | 1432.54                                     | ++       |             |         | +        | key fragments [283/324/948/1110] see Fig. 10F insensitive to JB-mannosidase sensitive to HF (loss of 2x121), afterwards sensitive to $\alpha$ 1,2/3-mannosidase (-1Man)                                       |
| H5N2        | 1313.49<br>7.8 g.u.<br>[0.02]   |                                | +        |             |         |          | key fragment [827] sensitive to $\alpha$ 1,6-mannosidase and to $\alpha$ 1,2/3-mannosidase (each -1Man). Only after $\alpha$ 1,6-mannosidase treatment, $\alpha$ 1,2/3-mannosidase removes 2Man                     | H3N2F2PC     | 1446.56<br>13.7 g.u.<br>[-0.05] |                                             | +        | ++          |         |          | key fragments [474/620/919] see Fig. 3G sensitive to $\alpha$ 1,2-fucosidase (-1Fuc) and $\alpha$ 1,6-mannosidase (-1Man), HF sensitive (loss of 165), then fragmentation as 1281 > 20 g.u., see Fig. 5       |
| H5N2        | 1313.49<br>8.5 g.u.<br>[0.03]   |                                | +        |             |         |          | key fragment [827] co-elution with <i>Pristionchus</i> sensitive to $\alpha$ 1,2/3-mannosidase (-1Man)                                                                                                              | H6N2         | 1475.55<br>6.8 g.u.<br>[-0.09]  |                                             | ++       |             |         |          | key fragment [989] co-elution with <i>Pristionchus</i> sensitive to $\alpha$ 1,2-mannosidase (-1Man) and $\alpha$ 1,2/3-mannosidase (-2Man)                                                                   |
| H3N3[MAEP]  | 1313.51<br>14.5 g.u.<br>[-0.08] | 1311.50                        | +        |             |         |          | key fragments [324/1192] sensitive to $\alpha$ 1,2/3-mannosidase (-1Man)                                                                                                                                            | H6N2         | 1475.55<br>7.2 g.u.<br>[0.15]   |                                             | +++      |             |         | +        | key fragment [827] sensitive to JB-mannosidase (-5Man), $\alpha$ 1,6-mannosidase (-1Man) then coeluting with standard A (Man5), see Fig. 7D sensitive to $\alpha$ 1,2/3-mannosidase (-1Man)                   |
| H3N3F       | 1338.53<br>13.0 g.u.<br>[-0.06] |                                | +        |             |         | +        | key fragments [446/1176] co-elution with <i>Pristionchus</i> sensitive to FDL (-1GlcNAc) see Fig. 11                                                                                                                | H3N3F2       | 1484.58<br>11.0 g.u.<br>[0.13]  |                                             |          |             |         | +        | key fragments [446/592/1281] in PNGase A pool only co-elution with <i>Pristionchus</i>                                                                                                                        |
| H3N3F       | 1338.53<br>>20 g.u.<br>[0.12]   |                                | +        | +           |         |          | key fragment [446/1135] co-elution with <i>Pristionchus</i>                                                                                                                                                         | H3N3F2       | 1484.58<br>>20 g.u.<br>[0.00]   |                                             |          |             | +       |          | key fragments [350/446/1135/1338] insensitive to JB-hexosaminidase sensitive to bovine fucosidase (-2 Fuc) late elution indicative of upper arm                                                               |
| H4N3        | 1354.52<br>9.0 g.u.<br>[0.11]   |                                | +        |             |         |          | key fragments [462/1192] see Fig. 8D sensitive to FDL (-1GlcNAc) insensitive to $\alpha$ 1,2/3-mannosidase                                                                                                          | H2N3F[HMef]  | 1498.60<br>>20 g.u.<br>[0.00]   |                                             |          |             | +       |          | key fragment [446] not observed in negative mode sensitive to bovine fucosidase (-1Fuc) sensitive to HF (loss of 322)                                                                                         |
| H2N4[MAEP]  | 1354.54<br>14.5 g.u.<br>[0.14]  | 1352.52                        | +        |             |         |          | key fragment [324/527/1030] sensitive to HF (loss of 121) late elution indicative of upper arm                                                                                                                      | H3N3FS2      |                                 | [M-2H+Na]<br>1518.48<br>6.2 g.u.<br>[-0.06] |          |             |         | +        | key fragments [241/282/403/444 negative mode] see Fig. 14 D                                                                                                                                                   |

| Structure                                                                                             | [M+H] <sup>+</sup>              | [M-H] <sup>-</sup>                                       | PNGase F |             |         | PNGase A | Evidence                                                                                                                                                                                                  | Structure                                                                                                      | [M+H] <sup>+</sup>             | [M-H] <sup>-</sup> | PNGase F |             |         | PNGase A | Evidence                                                                                                                                                                                   |
|-------------------------------------------------------------------------------------------------------|---------------------------------|----------------------------------------------------------|----------|-------------|---------|----------|-----------------------------------------------------------------------------------------------------------------------------------------------------------------------------------------------------------|----------------------------------------------------------------------------------------------------------------|--------------------------------|--------------------|----------|-------------|---------|----------|--------------------------------------------------------------------------------------------------------------------------------------------------------------------------------------------|
|                                                                                                       |                                 |                                                          | neutral  | hydrophobic | anionic |          |                                                                                                                                                                                                           |                                                                                                                |                                |                    | neutral  | hydrophobic | anionic |          |                                                                                                                                                                                            |
| 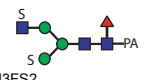<br>H3N3FS2           |                                 | [M-2H+Na] <sup>-</sup><br>1518.48<br>7.9 g.u.<br>[-0.08] |          |             | +       |          | key fragments<br>[241/282/403/444 negative mode]                                                                                                                                                          | <br>H2N3F[HMeFHexA][MAEP]   | 1795.67<br>6.5 g.u.<br>[0.00]  | 1793.66            |          |             |         | +        | key fragments [446/648/1094/1297]<br>loss of 498 then 203 <b>see Fig. 15D</b><br>sensitive to HF, loss of 498 and 121 resulting in m/z 1176                                                |
| <br>H2N3[HMeFHexA]    | 1528.57<br>13.5 g.u.<br>[-0.01] | 1526.56                                                  | ++       |             | ++      |          | key fragments [827/1030]<br><b>see Fig. 15A</b><br>sensitive to HF (loss of 498)                                                                                                                          | <br>H8N2                    | 1799.65<br>4.7 g.u.<br>[0.11]  |                    | ++       |             |         |          | key fragment [989]<br>sensitive to α1,2-mannosidase (-2Man), α1,2/3-mannosidase (-3Man) and α1,6-mannosidase (-1Man) then co-eluting with H7N2 (5.4g.u.) <b>see Fig.7A</b>                 |
| <br>H3N4F             | 1541.60<br>>20 g.u.<br>[0.13]   |                                                          | +        |             |         |          | key fragment [446]<br>co-elution with <i>Pristionchus</i><br>sensitive to bovine fucosidase (-1Fuc)                                                                                                       | <br>H8N2                    | 1799.65<br>5.0 g.u.<br>[0.15]  |                    | +++      |             |         | +        | key fragment [1151], Man8B<br>co-elution with <i>Pristionchus</i>                                                                                                                          |
| <br>H3N3[MAEP]3       | 1555.60<br>4.0 g.u.<br>[0.13]   | 1553.58                                                  | ++       |             | +       |          | key fragments [283/324/607/932/1231]<br><b>see Fig. 10G</b> , insensitive to JB-mannosidase, sensitive to HF (loss of 3x121) prior to α1,2/3-mannosidase (-1Man)                                          | <br>H8N2                    | 1799.65<br>5.8 g.u.<br>[0.17]  |                    | +        |             |         |          | key fragment [989], Man8A<br>co-elution with <i>Pristionchus</i><br>sensitive to α1,2-mannosidase (-3Man)                                                                                  |
| <br>H4N4              | 1557.60<br>12.5 g.u.<br>[-0.16] |                                                          | +        |             |         |          | key fragments [462/1192/1354]<br><b>see Fig. 8E</b>                                                                                                                                                       | <br>H3N3F[HMeFHexA]         | 1836.68<br>12.0 g.u.<br>[0.16] | 1834.67            | +        |             |         | +        | key fragments [446/973/1338]<br>in negative mode [497/700]<br>sensitive to HF (loss of 498), prior to FDL (-1GlcNAc) <b>see Fig. 16</b>                                                    |
| <br>H7N2              | 1637.60<br>5.4 g.u.<br>[0.10]   |                                                          | +++      |             | +       | +        | key fragment [989]<br>co-elution with <i>Pristionchus</i><br>sensitive to α1,2-mannosidase (-2Man)                                                                                                        | <br>H3N3F[HMeFHexA]         | 1836.68<br>>20 g.u.<br>[0.06]  | 1834.67            | +        |             |         | +        | key fragments [446/1135/1338]<br>sensitive to HF (loss of 498)<br>sensitive to bovine fucosidase (-1Fuc) and JB-mannosidase (-1Man)                                                        |
| <br>H7N2              | 1637.60<br>5.8 g.u.<br>[0.16]   |                                                          | ++       |             |         |          | key fragment [989]<br>sensitive to α1,2-mannosidase and α1,6-mannosidase (each -1Man), then co-elution with H6N2 at 6.8 g.u.<br><b>see Fig. 7B+C</b>                                                      | <br>H4N3[HMeFHexA]          | 1852.68<br>8.0 g.u.<br>[-0.01] | 1850.66            |          |             |         | +        | key fragments [462/989/1151/1354]                                                                                                                                                          |
| <br>H7N2              | 1637.60<br>6.2 g.u.<br>[0.16]   |                                                          | +        |             |         |          | key fragment [1151]<br>co-elution with <i>Pristionchus</i><br>sensitive to α1,2-mannosidase (-2Man)                                                                                                       | <br>H3N4[MAEP]4             | 1879.72<br>3.4 g.u.<br>[0.13]  | 1877.71            | +        |             |         | +        | key fragments [283/324/607/1272/1555]                                                                                                                                                      |
| <br>H7N2             | 1637.60<br>7.4 g.u.<br>[0.15]   |                                                          | +        |             |         |          | key fragment [989]<br>sensitive to α1,2/3-mannosidase (-3Man)<br>insensitive to α1,6-mannosidase                                                                                                          | <br>H3N3F[HMeFHexA][MAEP]  | 1957.73<br>5.7 g.u.<br>[-0.01] | 1955.71            |          |             |         | +        | key fragments [324/446/648/1094/1256/1459]<br>loss of 498 then 203                                                                                                                         |
| <br>H3N4[MAEP]2     | 1637.63<br>9.8 g.u.<br>[0.07]   | 1635.62                                                  | +        |             |         | +        | key fragments [324/486/827/1516]<br><b>see Fig. 10H</b><br>sensitive to HF (loss of 2x121) then fragmentation as m/z 1395 (11.0 g.u)                                                                      | <br>H9N2                  | 1961.71<br>4.4 g.u.<br>[0.11]  |                    | ++       |             |         |          | key fragment [1151]<br>sensitive to α1,2-mannosidase (-2Man) prior to α1,2/3-mannosidase (-2Man), sensitive to α1,6-mannosidase (-1Man) <b>see Fig. 7 F-I</b>                              |
| <br>H3N3F[HMeF]     | 1660.65<br>>20 g.u.<br>[0.16]   |                                                          |          |             | +       |          | key fragments [446/1135/1338]<br>not observed in negative mode<br>sensitive to bovine fucosidase (-1Fuc)<br>sensitive to HF (loss of 322)                                                                 | <br>H9N2                  | 1961.71<br>5.4 g.u.<br>[0.17]  |                    | +++      |             |         | +        | key fragment [1151]<br>co-elution with <i>Pristionchus</i><br>sensitive to JB-mannosidase (-8Man)<br>sensitive to α1,2-mannosidase (-4Man)                                                 |
| <br>H2N3F[HMeFHexA] | 1674.63<br>>20 g.u.<br>[0.09]   | 1672.62                                                  | ++       |             | ++      |          | key fragments [446/973/1176]<br><b>see Fig. 15B</b> negative mode [497/700] <b>see Fig. 17B</b><br>sensitive to HF (loss of 498)<br>sensitive to bovine fucosidase (-1Fuc)<br>insensitive to FDL after HF | <br>H3N5[MAEP]3           | 1961.76<br>7.9 g.u.<br>[0.14]  | 1959.74            | +        |             |         |          | key fragments [324/648/827/1475/1637]<br><b>see Fig. 10J</b><br>insensitive to JB-mannosidase<br>sensitive to HF (loss of 3x121), key fragment then m/z 406, afterwards insensitive to FDL |
| <br>H3N3[HMeFHexA]  | 1690.63<br>14.0 g.u.<br>[0.02]  | 1688.61                                                  | +        |             | ++      |          | key fragments [462/989/1192]<br><b>see Fig. 15C</b><br>sensitive to HF (loss of 498)                                                                                                                      | <br>H2N4F[HMeFHexA][MAEP] | 1998.75<br>>20 g.u.<br>[0.02]  | 1996.74            |          |             |         | +        | key fragments [324/446/486/527/973/1297/1500]<br>loss of 498 then 203 then 324<br><b>see Fig. 15E</b>                                                                                      |
| <br>H3N4[MAEP]3     | 1758.68<br>7.9 g.u.<br>[0.13]   | 1756.66                                                  | +        |             |         |          | key fragments [324/607/1272/1434]<br><b>see Fig. 10I</b><br>loss of 324 then 162<br>sensitive to HF (loss of 3x121)<br>prior to FDL (-1GlcNAc)                                                            | <br>H5N3[HMeFHexA]        | 2014.73<br>6.8 g.u.<br>[-0.11] | 2012.72            |          |             |         | +        | key fragments [827/1313/1516]<br>loss of 498 then 203                                                                                                                                      |
